# Supplementary material
Source: PubMed Central journal article supplement (PMC122386)

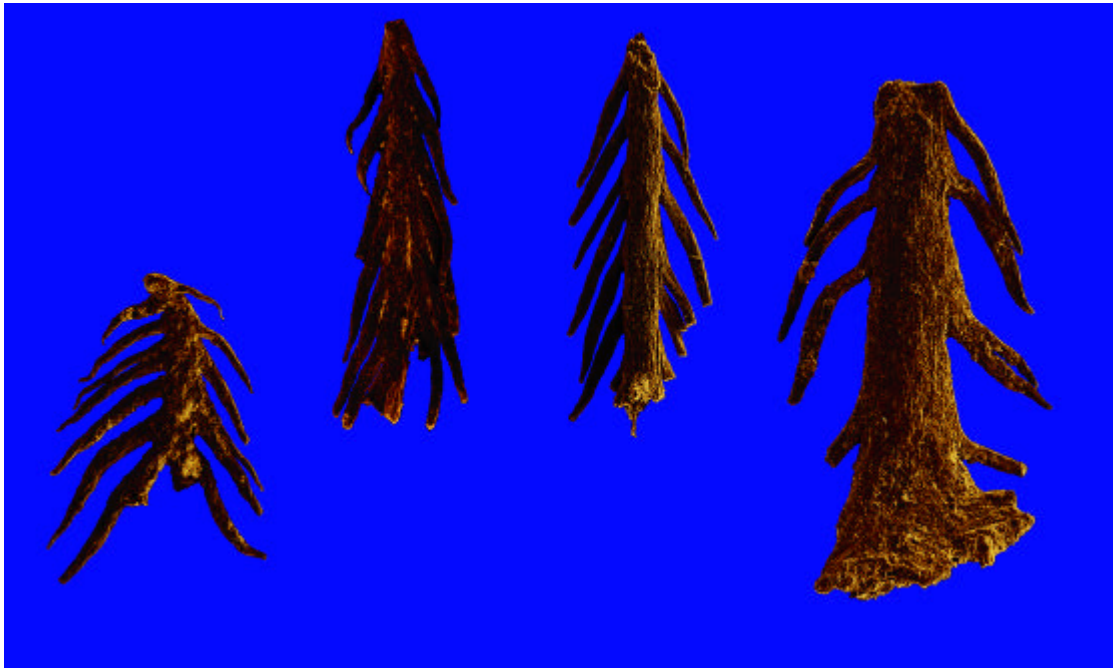

Supplement: pnas_99_4_2455__5.pdf [file pnas_99_4_2455__5.pdf]
